# Supplementary material for: Sandwiched graphene inserted with graphene-encapsulated yolk–shell γ-Fe2O3nanoparticles for efficient lithium ion storage
Source: Royal Society of Chemistry journal article supplement (doi:10.1039/c7ta01239j), 2017-01-01
Supplement: c7ta01239j1.pdf [file c7ta01239j1.pdf]

## Supporting Information

### Sandwiched Graphene Inserted with Graphene-encapsulated Yolk-shell $\gamma$ - $\text{Fe}_2\text{O}_3$ Nanoparticles for Efficient Lithium Ion Storage

Miao Zhang <sup>a</sup>, Enzuo Liu <sup>a</sup>, Tingting Cao <sup>a</sup>, Huayu Wang <sup>a</sup>, Chunsheng Shi <sup>a</sup>, Jiajun Li <sup>a</sup>, Chunnian He <sup>a,b</sup>, Fang He <sup>a</sup>, Liying Ma <sup>a,\*</sup> and Naiqin Zhao <sup>a,b,\*</sup>

<sup>a</sup> School of Materials Science and Engineering and Tianjin Key Laboratory of Composite and Functional Materials, Tianjin University, Tianjin 300072, China.

<sup>b</sup> Collaborative Innovation Center of Chemical Science and Engineering, Tianjin 300072, China.

\*E-mail: [lyma@tju.edu.cn](mailto:lyma@tju.edu.cn) and [nqzhao@tju.edu.cn](mailto:nqzhao@tju.edu.cn)

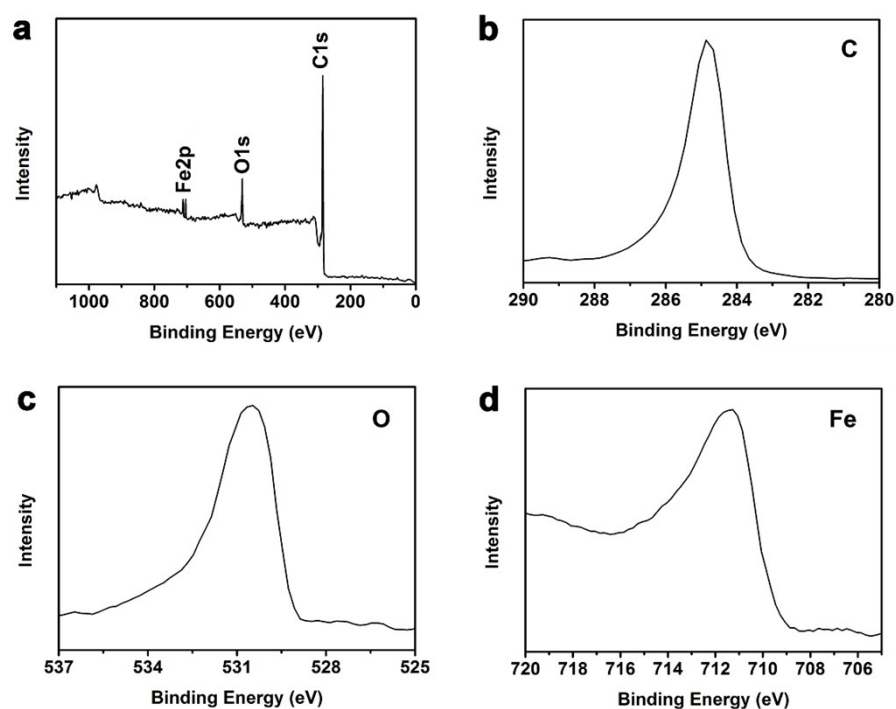

**Figure S1** XPS spectra of a representative YS- $\gamma$ - $\text{Fe}_2\text{O}_3$ @G-GS composite. (a) Entire XPS spectrum, (b) carbon, (c) oxygen and (d) iron.

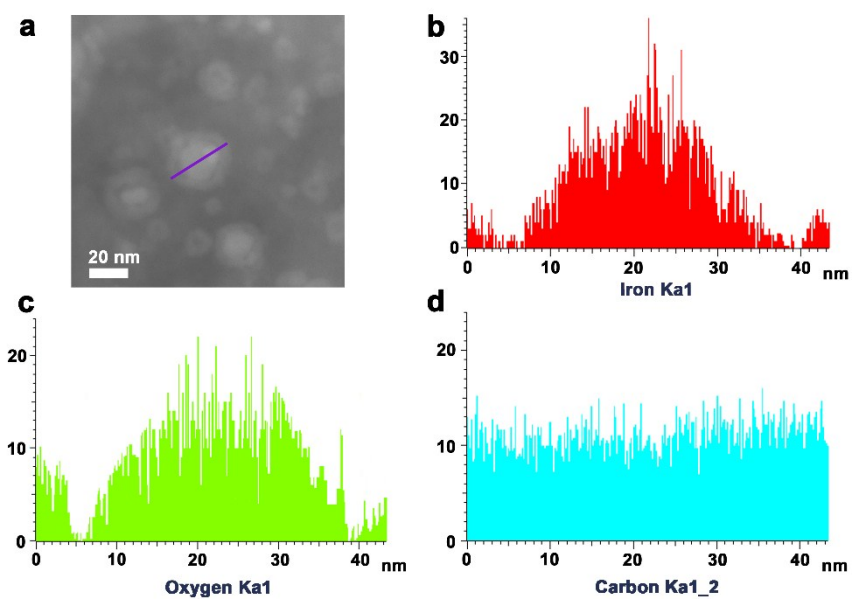

**Figure S2** (a) STEM image and cross sectional composition line profiles of YS- $\gamma$ -Fe<sub>2</sub>O<sub>3</sub>@G-GS, in which (b) the red one is Fe, (c) the green one is oxygen and (d) the blue one is carbon.

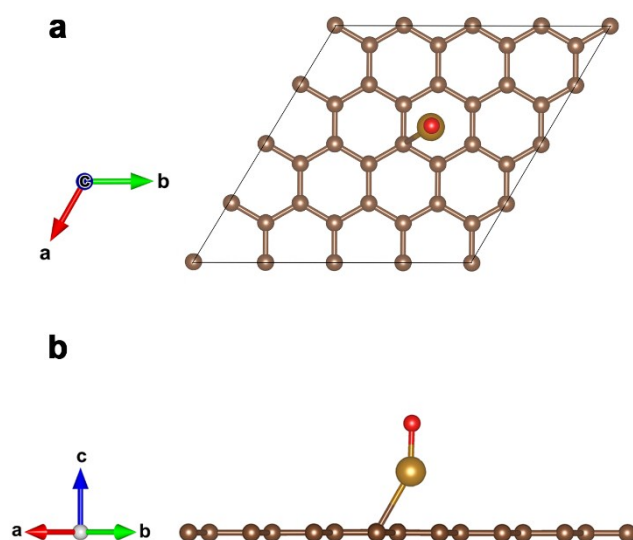

**Figure S3** Schematic drawing of O atom placed on top of graphene-Fe surface in top (a) and side (b) views. (Red sphere represent the O atom, yellow sphere represent the Fe atom and brown spheres represent the C atoms). (For interpretation of the references to color in this figure legend, the reader is referred to the web version of the article.)

**Table S1** Detailed information of rate cycle performance of YS- $\gamma$ -Fe<sub>2</sub>O<sub>3</sub>@G-GS and Fe<sub>2</sub>O<sub>3</sub>-GS composite electrode corresponding to **Figure 6c**

| Rate cycle number | Step number | Number of cycle | Charge/discharge rate (C, 1 C=1 A/g) | Average reversible capacity of YS- $\gamma$ -Fe <sub>2</sub> O <sub>3</sub> @G-GS (mAh/g) | Average reversible capacity of Fe <sub>2</sub> O <sub>3</sub> -GS (mAh/g) |
|-------------------|-------------|-----------------|--------------------------------------|-------------------------------------------------------------------------------------------|---------------------------------------------------------------------------|
| 1                 | 1           | 20              | 0.1                                  | 800                                                                                       | 506                                                                       |
|                   | 2           | 40              | 0.2                                  | 661                                                                                       | 426                                                                       |
|                   | 3           | 60              | 0.5                                  | 599                                                                                       | 342                                                                       |
|                   | 4           | 80              | 1                                    | 526                                                                                       | 261                                                                       |
|                   | 5           | 100             | 2                                    | 469                                                                                       | 210                                                                       |
|                   | 6           | 120             | 5                                    | 357                                                                                       | 147                                                                       |
|                   | 7           | 140             | 10                                   | 284                                                                                       | 50                                                                        |
| 2                 | 8           | 160             | 0.1                                  | 1050                                                                                      | 492                                                                       |
|                   | 9           | 180             | 0.2                                  | 935                                                                                       |                                                                           |
|                   | 10          | 200             | 0.5                                  | 852                                                                                       |                                                                           |
|                   | 11          | 220             | 1                                    | 708                                                                                       |                                                                           |
|                   | 12          | 240             | 2                                    | 578                                                                                       |                                                                           |
|                   | 13          | 260             | 5                                    | 451                                                                                       |                                                                           |
|                   | 14          | 280             | 10                                   | 335                                                                                       |                                                                           |
| 3                 | 15          | 300             | 0.1                                  | 1173                                                                                      |                                                                           |
|                   | 16          | 320             | 0.2                                  | 989                                                                                       |                                                                           |
|                   | 17          | 340             | 0.5                                  | 827                                                                                       |                                                                           |
|                   | 18          | 360             | 1                                    | 737                                                                                       |                                                                           |
|                   | 19          | 380             | 2                                    | 574                                                                                       |                                                                           |
|                   | 20          | 400             | 5                                    | 443                                                                                       |                                                                           |
|                   | 21          | 420             | 10                                   | 350                                                                                       |                                                                           |
| 4                 | 22          | 460             | 0.1                                  | 1187                                                                                      |                                                                           |
